# Supplementary material
Source: publisher figshare collection journal article supplement (https://future-science-group.figshare.com/ndownloader/files/34444853)
Supplement: Supplementary file 1 [file 34444853]

Table S2. Statistics of the nanopore sequencing data

| Type | Total reads | Total bases(bp) | Mean quality | Max length(bp) | N50 (bp) |
| --- | --- | --- | --- | --- | --- |
| Raw data | 1,790,896 | 2,077,737,473 | 12.1 | 18,201 | 1,225 |
| Clean data | 1,714,914 | 1,942,207,080 | 13.3 | 13,275 | 1,191 |
| Mapped | 1,609,895 | 1,826,897,055 | 13.4 | 3,473 | 1,190 |
